# Supplementary material
Source: PubMed Central journal article supplement (PMC3057779)
Supplement: supp_M110.156463_jbc.M110.156463-1.pdf [file supp_M110.156463_jbc.M110.156463-1.pdf]

# Supplementary Figure S1

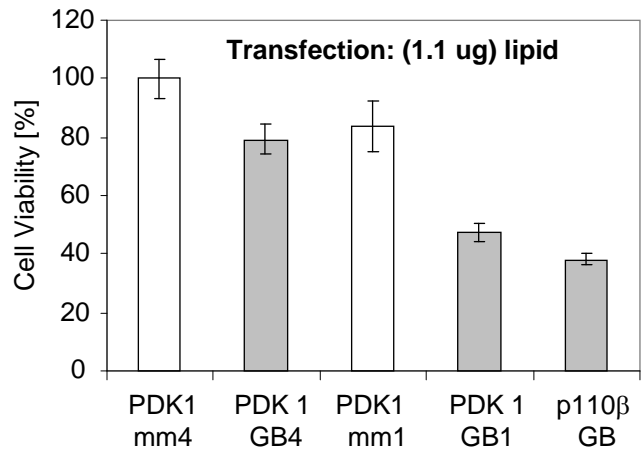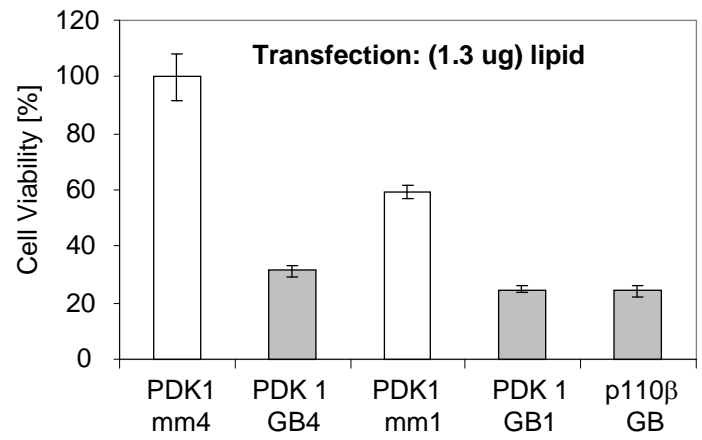

# Supplementary Figure S2

**a**

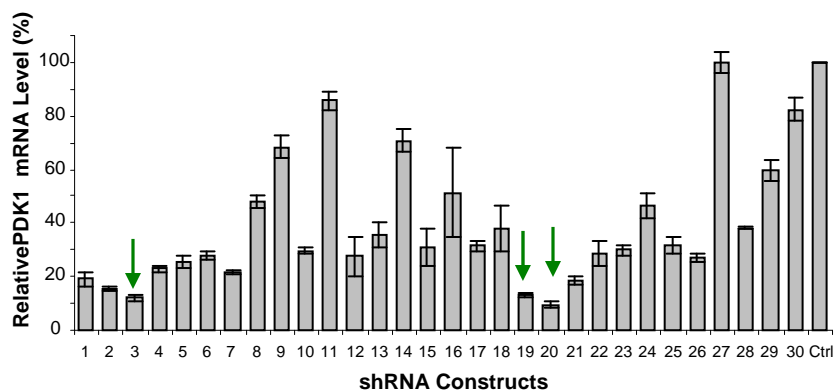

**b**

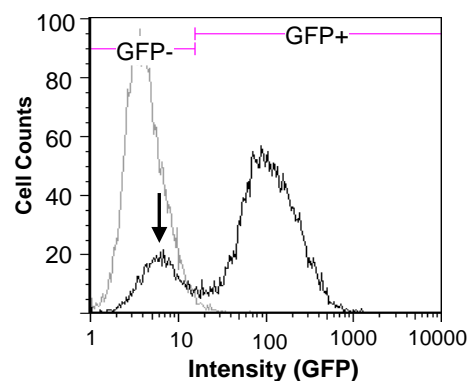

**c**

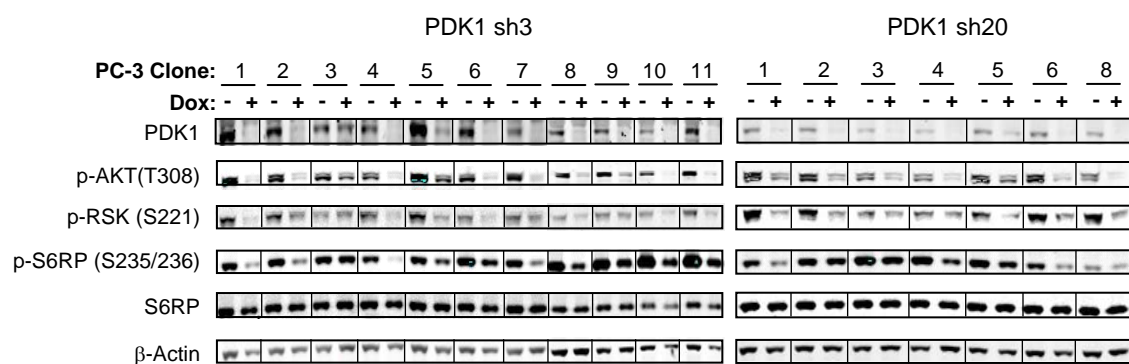

**d**

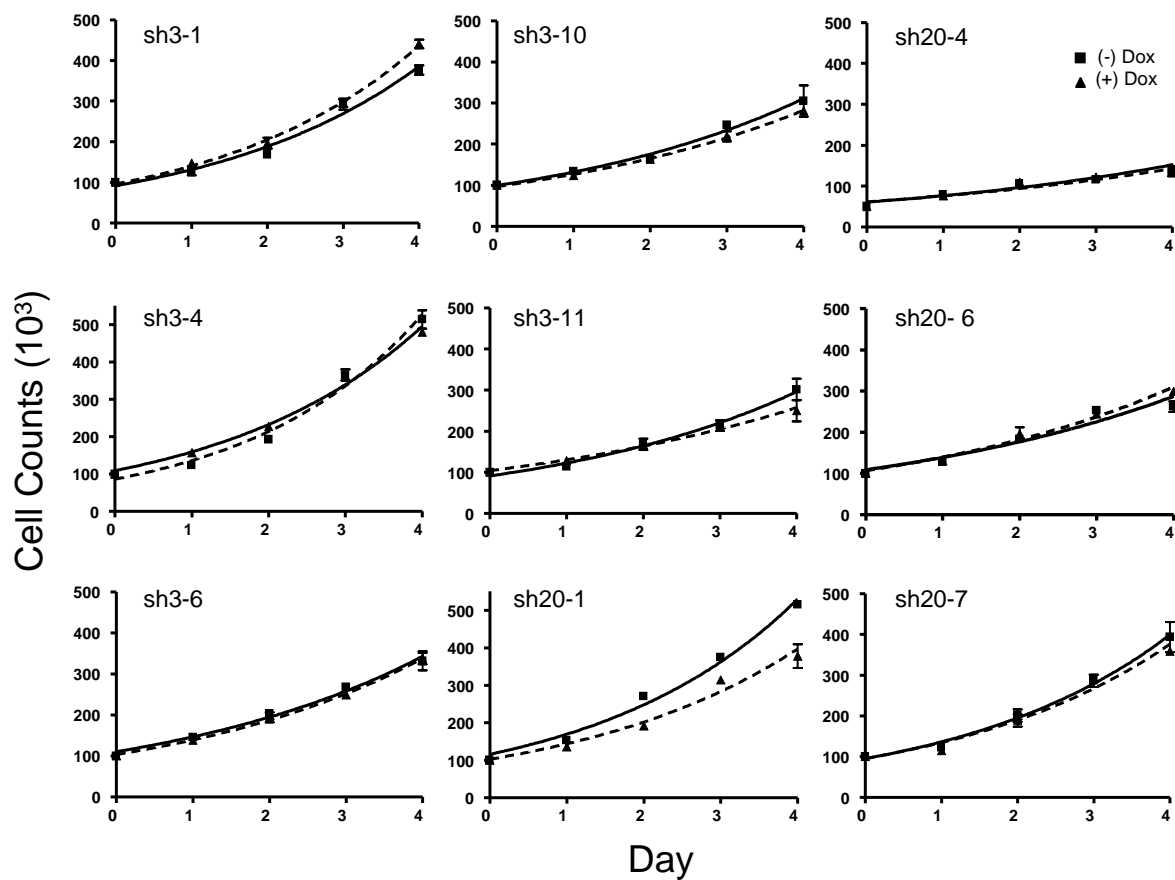

# Table S1. Kinase Selectivity Data for PDK1 Inhibitors

| Cmpd 1 [10 μM]   |            | Cmpd 2 [1 μM]        |            | Cmpd 3 [1 μM]        |            | Cmpd 4 [10 μM]       |            | Cmpd 5 [1 μM]  |            | Cmpd 6 [1 μM]        |            | Cmpd 7 [10 μM]       |            |
|------------------|------------|----------------------|------------|----------------------|------------|----------------------|------------|----------------|------------|----------------------|------------|----------------------|------------|
| Kinase           | % Activity | Kinase               | % Activity | Kinase               | % Activity | Kinase               | % Activity | Kinase         | % Activity | Kinase               | % Activity | Kinase               | % Activity |
| ABL(h)           | 86         | ABL(h)               | 71         | ABL(h)               | 73         | ABL(h)               | 73         | ABL(h)         | 112        | ABL(h)               | 112        | ABL(h)               | 112        |
| ACK(h)           | 66         | Abi (H396P)(h)       | 49         | Abi(T315I)(h)        | 113        | Abi(T315I)(h)        | 62         | ABL(m)         | 98         | Abi (H396P)(h)       | 114        | Abi (H396P)(h)       | 114        |
| AKT1(h)          | 39         | Abi(M35T1)(h)        | 50         | ALK(h)               | 100        | ALK(h)               | 42         | ABL(T315I)(h)  | 86         | Abi(M35T1)(h)        | 110        | Abi(M35T1)(h)        | 110        |
| ALK(h)           | 26         | Abi(Q252H)(h)        | 54         | ALK4(h)              | 99         | ALK4(h)              | 18         | ABL2(h)        | 111        | Abi(Q252H)(h)        | 69         | Abi(Q252H)(h)        | 69         |
| AMPK(α)          | 12         | Abi(T315I)(h)        | 88         | Arg(h)               | 97         | Arg(h)               | 78         | ABL2(m)        | 110        | Abi(T315I)(h)        | 91         | Abi(T315I)(h)        | 91         |
| AURKC(h)         | 4          | Abi(Y235F)(h)        | 60         | ARR5(h)              | 8          | ARR5(h)              | 66         | AKT1(h)        | 102        | Abi(Y235F)(h)        | 110        | Abi(Y235F)(h)        | 110        |
| BRAF(h)          | 114        | ASK1(h)              | 32         | ASK1(h)              | 65         | ASK1(h)              | 77         | AKT2(h)        | 94         | ASK1(h)              | 94         | ASK1(h)              | 94         |
| BRK2(h)          | 1          | ALK(h)               | 77         | Aurora-A(h)          | 0          | Aurora-A(h)          | 8          | AKT3(h)        | 90         | ALK(h)               | 116        | ALK(h)               | 116        |
| BT(h)            | 83         | ALK4(h)              | 93         | Axl(h)               | 93         | Axl(h)               | 3          | ALK(h)         | 116        | ALK4(h)              | 115        | ALK4(h)              | 115        |
| CDC7(h)          | 70         | Arg(h)               | 104        | Bmx(h)               | 94         | Bmx(h)               | 25         | ALK4(h)        | 138        | Arg(h)               | 112        | Arg(h)               | 112        |
| CDK2/CNA3(h)     | 53         | ARR5(h)              | 11         | BRK(h)               | 97         | BRK(h)               | 81         | AMPK(α)        | 104        | ARR5(h)              | 112        | ARR5(h)              | 112        |
| CDK4(h)          | 21         | ASK1(h)              | 7          | BRK1(h)              | 76         | BRK1(h)              | 36         | ARR5(h)        | 4          | ASK1(h)              | 106        | ASK1(h)              | 106        |
| CHK1(h)          | 10         | Aurora-A(h)          | 104        | BRK2(h)              | 81         | BRK2(h)              | 57         | AURK4(h)       | 104        | Aurora-A(h)          | 99         | Aurora-A(h)          | 99         |
| CSK(h)           | 101        | Axl(h)               | 18         | BT(h)                | 76         | BT(h)                | 75         | Axl(h)         | 96         | Axl(h)               | 107        | Axl(h)               | 107        |
| CSNK1(α)         | 59         | Bmx(h)               | 89         | CaMKI(h)             | 97         | CaMKI(h)             | 9          | BLK(m)         | 92         | Bmx(h)               | 107        | Bmx(h)               | 107        |
| CSNK2(α)         | 43         | BRK(h)               | 105        | CaMKIβ(h)            | 20         | CaMKIβ(h)            | 6          | BMX(h)         | 94         | BRK(h)               | 94         | BRK(h)               | 94         |
| CSNK2A1(h)       | 71         | BrSk1(h)             | 29         | CaMKII(h)            | 97         | CaMKII(h)            | 58         | BRSK2(h)       | 18         | BrSk1(h)             | 139        | BrSk1(h)             | 139        |
| DNA-PK(h)        | 87         | BRK2(h)              | 15         | CaMKIβ(h)            | 3          | CaMKIβ(h)            | 11         | BT(h)          | 95         | BRK2(h)              | 116        | BRK2(h)              | 116        |
| DYRK1A(h)        | 64         | CaMKI(h)             | 79         | CaMKII(h)            | 102        | CaMKII(h)            | 69         | CaMK(h)        | 45         | CaMKI(h)             | 109        | CaMKI(h)             | 109        |
| EGFR(h)          | 75         | BT(h)                | 100        | CaMKIβ(h)            | 86         | CaMKIβ(h)            | 47         | CaMK4(h)       | 61         | BT(h)                | 111        | BT(h)                | 111        |
| EPHA2(h)         | 96         | CaMKI(h)             | 63         | CDK1/cyclinB(h)      | 99         | CDK1/cyclinB(h)      | 90         | CaMKI(α)       | 79         | CaMKI(h)             | 107        | CaMKI(h)             | 107        |
| EPHA4(h)         | 101        | CaMKII(h)            | 78         | CDK2/cyclinA(h)      | 99         | CDK2/cyclinA(h)      | 118        | CDCA2BP(h)     | 105        | CaMKII(h)            | 106        | CaMKII(h)            | 106        |
| ERBB2(h)         | 130        | CaMKII(h)            | 13         | CDK2/cyclinE(h)      | 107        | CDK2/cyclinE(h)      | 99         | GDK1(h)        | 183        | CDK2/cyclinA(h)      | 96         | CDK2/cyclinA(h)      | 96         |
| ERK2/MAPK1(α)    | 11         | CaMKIβ(h)            | 25         | CDK3/cyclinE(h)      | 89         | CDK3/cyclinE(h)      | 84         | CDK2(h)        | 107        | CaMKIβ(h)            | 105        | CaMKIβ(h)            | 105        |
| FGFR1(h)         | 30         | CDK5/p25(h)          | 22         | CDK5/p25(h)          | 46         | CDK5/p25(h)          | 82         | CDK2(h)        | 102        | CDK5/p25(h)          | 97         | CDK5/p25(h)          | 97         |
| FGFR3(h)         | 32         | CaMKIβ(h)            | 55         | CDK5/p35(h)          | 47         | CDK5/p35(h)          | 98         | CDK3(h)        | 96         | CaMKIβ(h)            | 92         | CaMKIβ(h)            | 92         |
| FLT3(h)          | 25         | CDK1/cyclinB(h)      | 100        | CDK6/cyclinD3(h)     | 86         | CDK6/cyclinD3(h)     | 103        | CDK5(h)        | 114        | CDK1/cyclinB(h)      | 96         | CDK1/cyclinB(h)      | 96         |
| GSK3β(h)         | 83         | CDK1/cyclinA(h)      | 104        | CDK7/cyclinH/MAT1(h) | 75         | CDK7/cyclinH/MAT1(h) | 73         | CDK5(h)        | 103        | CDK1/cyclinA(h)      | 103        | CDK1/cyclinA(h)      | 103        |
| IGF1R(h)         | 61         | CDK2/cyclinE(h)      | 116        | CDK9/cyclin T1(h)    | 70         | CDK9/cyclin T1(h)    | 126        | CDK6(h)        | 106        | CDK2/cyclinE(h)      | 111        | CDK2/cyclinE(h)      | 111        |
| IKK_BETA(h)      | 15         | CDK3/cyclinE(h)      | 106        | CHK1(h)              | 54         | CHK1(h)              | 75         | CDK7(h)        | 55         | CDK3/cyclinE(h)      | 104        | CDK3/cyclinE(h)      | 104        |
| JNK1(h)          | 28         | CHK2(h)              | 122        | CHK2(h)              | 60         | CHK2(h)              | 5          | CHK2(h)        | 5          | CHK1(h)              | 113        | CHK1(h)              | 113        |
| JNK1A1(h)        | 10         | CHK2(h)              | 104        | CHK2(R157T)(h)       | 71         | CHK2(R157T)(h)       | 6          | CHK1(h)        | 6          | CHK2(h)              | 113        | CHK2(h)              | 113        |
| KDR(h)           | 92         | CDK6/cyclinD3(h)     | 102        | CHK2(R145W)(h)       | 101        | CHK2(R145W)(h)       | 1          | CK2(h)         | 103        | CDK6/cyclinD3(h)     | 111        | CDK6/cyclinD3(h)     | 111        |
| KIT(h)           | 40         | CDK7/cyclinH/MAT1(h) | 102        | CK1γ1(h)             | 112        | CK1γ1(h)             | 51         | CSF1R(h)       | 55         | CK1γ1(h)             | 97         | CK1γ1(h)             | 97         |
| LCK(h)           | 26         | CDK9/cyclin T1(h)    | 96         | CK1γ2(h)             | 89         | CK1γ2(h)             | 39         | CSK(h)         | 110        | CDK9/cyclin T1(h)    | 102        | CDK9/cyclin T1(h)    | 102        |
| MAP3K14(h)       | 92         | CHK1(h)              | 46         | CK1γ3(h)             | 87         | CK1γ3(h)             | 2          | CSNK1A1(YEAST) | 69         | CHK1(h)              | 105        | CHK1(h)              | 105        |
| MAP3K7(h)        | 12         | CHK2(h)              | 4          | CK1β(h)              | 94         | CK1β(h)              | 35         | CSNK1A1(h)     | 111        | CK1β(h)              | 92         | CK1β(h)              | 92         |
| MAPK9(h)         | 87         | CHK2(H157T)(h)       | 9          | CK2(h)               | 103        | CK2(h)               | 103        | DAPK2(h)       | 90         | CHK2(h)              | 105        | CHK2(h)              | 105        |
| MAPK1(h)         | 33         | CHK2(R145W)(h)       | 12         | CK2α2(h)             | 109        | CK2α2(h)             | 90         | DAPK3(h)       | 43         | CHK2(H157T)(h)       | 132        | CHK2(H157T)(h)       | 132        |
| MAPKAPK2(h)      | 17         | CK1γ1(h)             | 97         | ckit(D816H)(h)       | 14         | ckit(D816H)(h)       | 22         | DDR2(h)        | 107        | CK1γ1(h)             | 90         | CK1γ1(h)             | 90         |
| MAPKAPK5(h)      | 17         | CK1γ2(h)             | 101        | ckit(D816V)(h)       | 76         | ckit(D816V)(h)       | 92         | DMPK(h)        | 114        | CK1γ2(h)             | 96         | CK1γ2(h)             | 96         |
| MAPKK1(RABBIT)   | 30         | CK1γ3(h)             | 113        | ckit(h)              | 100        | ckit(h)              | 71         | DYRK2(h)       | 90         | CK1γ3(h)             | 102        | CK1γ3(h)             | 102        |
| MARCK(h)         | 25         | CK1α(h)              | 105        | ckit(V560G)(h)       | 15         | ckit(V560G)(h)       | 18         | EGFR(h)        | 110        | CK1α(h)              | 109        | CK1α(h)              | 109        |
| MELK(h)          | 6          | CK1β(h)              | 104        | ckit(V654A)(h)       | 34         | ckit(V654A)(h)       | 34         | EGFR(L858R)(h) | 105        | CK1β(h)              | 97         | CK1β(h)              | 97         |
| MEK1(h)          | 28         | CK2(h)               | 112        | CLK3(h)              | 101        | CLK3(h)              | 65         | EGFR(L861Q)(h) | 99         | CLK3(h)              | 102        | CLK3(h)              | 102        |
| MEK2(h)          | 71         | ckit(D816H)(h)       | 9          | c-RAF(h)             | 94         | c-RAF(h)             | 94         | EPHA2(h)       | 107        | ckit(D816H)(h)       | 110        | ckit(D816H)(h)       | 110        |
| NEK2(h)          | 96         | ckit(D816V)(h)       | 93         | CSK(h)               | 107        | CSK(h)               | 82         | EPHA3(h)       | 109        | ckit(D816V)(h)       | 104        | ckit(D816V)(h)       | 104        |
| NEK6(h)          | 48         | ckit(h)              | 109        | cSRC(h)              | 86         | cSRC(h)              | 14         | EPHA4(h)       | 104        | ckit(h)              | 105        | ckit(h)              | 105        |
| NTRK3(h)         | 2          | ckit(V560G)(h)       | 9          | DAPK1(h)             | 91         | DAPK1(h)             | 50         | EPHA4(h)       | 94         | ckit(V560G)(h)       | 97         | ckit(V560G)(h)       | 97         |
| P38-ALPHA(h)     | 51         | ckit(V654A)(h)       | 46         | DAPK2(h)             | 100        | DAPK2(h)             | 85         | EPHB2(h)       | 239        | ckit(V654A)(h)       | 111        | ckit(V654A)(h)       | 111        |
| P38-BETA(h)      | 25         | CLK2(h)              | 68         | DCAMK2(h)            | 116        | DCAMK2(h)            | 105        | EPHB4(h)       | 106        | CLK2(h)              | 107        | CLK2(h)              | 107        |
| P38-DELTA(h)     | 46         | CLK3(h)              | 107        | DDR2(h)              | 113        | DDR2(h)              | 57         | EPHB4(h)       | 99         | CLK3(h)              | 99         | CLK3(h)              | 99         |
| P38-GAMMA(h)     | 46         | c-RAF(h)             | 107        | DMPK(h)              | 94         | DMPK(h)              | 97         | ERBB4(h)       | 103        | c-RAF(h)             | 102        | c-RAF(h)             | 102        |
| PAK1(h)          | 73         | CSK(h)               | 75         | DRAK1(h)             | 3          | DRAK1(h)             | 15         | FER(h)         | 104        | CSK(h)               | 100        | CSK(h)               | 100        |
| PAK4(h)          | 78         | cSRC(h)              | 87         | DYRK2(h)             | 97         | DYRK2(h)             | 86         | FES(h)         | 41         | cSRC(h)              | 115        | cSRC(h)              | 115        |
| PDGFRβ(h)        | 7          | DAPK1(h)             | 82         | eEF-2K(h)            | 106        | eEF-2K(h)            | 93         | FGFR1(h)       | 43         | DAPK1(h)             | 109        | DAPK1(h)             | 109        |
| PKA(h)           | 0          | DAPK3(h)             | 0          | EGFR(h)              | 109        | EGFR(h)              | 109        | FGFR2(h)       | 114        | DAPK3(h)             | 114        | DAPK3(h)             | 114        |
| PKH_GAMMA1(RABB) | 6          | DCAMK12(h)           | 112        | EGFR(L858R)(h)       | 102        | EGFR(L858R)(h)       | 50         | FGFR3(h)       | 102        | DCAMK12(h)           | 109        | DCAMK12(h)           | 109        |
| PI3K(h)          | 49         | DDR2(h)              | 101        | EGFR(L861Q)(h)       | 117        | EGFR(L861Q)(h)       | 72         | FGFR4(h)       | 99         | DDR2(h)              | 101        | DDR2(h)              | 101        |
| PI3K(h)          | 36         | DMPK(h)              | 100        | EGFR(T790M)(h)       | 82         | EGFR(T790M)(h)       | 65         | FGFR(h)        | 71         | DMPK(h)              | 94         | DMPK(h)              | 94         |
| PKA(BOVINE)      | 45         | DRAK1(h)             | 62         | EGFR(T790M.L858R)(h) | 103        | EGFR(T790M.L858R)(h) | 68         | FLT1(h)        | 86         | DRAK1(h)             | 121        | DRAK1(h)             | 121        |
| PKC2α(h)         | 8          | DYRK2(h)             | 102        | EphA1(h)             | 82         | EphA1(h)             | 18         | FLT3(h)        | 25         | DYRK2(h)             | 118        | DYRK2(h)             | 118        |
| PKC2β(h)         | 21         | eEF-2K(h)            | 115        | EphA2(h)             | 127        | EphA2(h)             | 95         | FLT3CD35Y(h)   | 6          | eEF-2K(h)            | 105        | eEF-2K(h)            | 105        |
| PKC(h)           | 73         | EGFR(h)              | 116        | EphA3(h)             | 114        | EphA3(h)             | 86         | FYNI(h)        | 71         | EGFR(h)              | 116        | EGFR(h)              | 116        |
| PK3(h)           | 54         | EGFR(L858R)(h)       | 76         | EphA4(h)             | 100        | EphA4(h)             | 77         | GSK3A(h)       | 107        | EGFR(L858R)(h)       | 101        | EGFR(L858R)(h)       | 101        |
| PRKAA1(h)        | 5          | EGFR(L861Q)(h)       | 68         | EphA5(h)             | 89         | EphA5(h)             | 90         | GSK3B(h)       | 105        | EGFR(L861Q)(h)       | 98         | EGFR(L861Q)(h)       | 98         |
| PTK2(h)          | 93         | EGFR(T790M)(h)       | 36         | EphA7(h)             | 131        | EphA7(h)             | 118        | HCK(h)         | 148        | EGFR(T790M)(h)       | 89         | EGFR(T790M)(h)       | 89         |
| RAF(h)           | 128        | EGFR(T790M.L858R)(h) | 12         | EphA8(h)             | 106        | EphA8(h)             | 91         | HIPK2(h)       | 105        | EGFR(T790M.L858R)(h) | 102        | EGFR(T790M.L858R)(h) | 102        |
| RIPK2(h)         | 20         | EphA1(h)             | 99         | EphB1(h)             | 101        | EphB1(h)             | 119        | IGF1R(h)       | 145        | EphA1(h)             | 96         | EphA1(h)             | 96         |
| ROCK1(h)         | 28         | EphA2(h)             | 131        | EphB2(h)             | 103        | EphB2(h)             | 99         | IKK_α/PHA(h)   | 96         | EphA2(h)             | 107        | EphA2(h)             | 107        |
| ROCK2(α)         | 21         | EphA3(h)             | 111        | EphB3(h)             | 93         | EphB3(h)             | 113        | IKK_BETA(h)    | 109        | EphA3(h)             | 109        | EphA3(h)             | 109        |
| RPS6KA1(α)       | 10         | EphA4(h)             | 103        | EphB4(h)             | 110        | EphB4(h)             | 83         | INSR(h)        | 103        | EphA4(h)             | 107        | EphA4(h)             | 107        |
| RPS6KA1(h)       | 68         | EphA5(h)             | 109        | ErbB4(h)             | 127        | ErbB4(h)             | 116        | INSR(h)        | 103        | EphA5(h)             | 127        | EphA5(h)             | 127        |
| RPS6KA5(h)       | 25         | EphA7(h)             | 102        | FAK(h)               | 80         | FAK(h)               | 76         | IRAK4(h)       | 85         | EphA7(h)             | 118        | EphA7(h)             | 118        |
| RPS9B(h)         | 17         | EphA8(h)             | 108        | Fer(h)               | 129        | Fer(h)               | 14         | ITK(h)         | 127        | EphA8(h)             | 101        | EphA8(h)             | 101        |
| RPS9K1(T412E)(h) | 11         | EphB1(h)             | 104        | Fes(h)               | 96         | Fes(h)               | 14         | JAK2(h)        | 100        | EphB1(h)             | 99         | EphB1(h)             | 99         |
| SGKH(h)          | 20         | EphB2(h)             | 92         | FGFR1(h)             | 48         | FGFR1(h)             | 4          | JAK3(h)        | 100        | EphB2(h)             | 103        | EphB2(h)             | 103        |
| SGK1(h)          | 3          | EphB3(h)             | 132        | FGFR1(V561M)(h)      | 9          | FGFR1(V561M)(h)      | 6          | JNK1A1(h)      | 106        | EphB3(h)             | 107        | EphB3(h)             | 107        |
| SRC(h)           | 94         | EphB4(h)             | 137        | FGFR2(h)             | 86         | FGFR2(h)             | 65         | JNK3(h)        | 110        | SRC(h)               | 104        | SRC(h)               | 104        |
| TIE2(h)          | 105        | EphB4(h)             | 102        | FGFR2(N549H)(h)      | 50         | FGFR2(N549H)(h)      | 11         | KDR(h)         | 95         | EphB4(h)             | 90         | EphB4(h)             | 90         |
| TOPK(h)          | 10         | FAK(h)               | 75         | FGFR3(h)             | 88         | FGFR3(h)             | 25         | KIT(h)         | 112        | FAK(h)               | 129        | FAK(h)               | 129        |
| ZAP70(h)         | 117        | Fer(h)               | 6          | FGFR4(h)             | 113        | FGFR4(h)             | 44         | Kiit(D816V)(h) | 107        | Fer(h)               | 102        | Fer(h)               | 102        |
|                  |            | Fes(h)               | 92         | Fgr(h)               | 97         | Fgr(h)               | 44         | LCK(h)         | 82         | Fes(h)               | 120        | Fes(h)               | 120        |
|                  |            | FGFR1(h)             | 29         | FR1(h)               | 14         | FR1(h)               | 6          | LIMK1(h)       | 120        | FGFR1(h)             | 103        | FGFR1(h)             | 103        |
|                  |            | FGFR1(V561M)(h)      | 73         | FR3(D835Y)(h)        | 2          | FR3(D835Y)(h)        | 10         | LYN(h)         | 99         | FGFR1(V561M)(h)      | 98         | FGFR1(V561M)(h)      | 98         |
|                  |            | FGFR2(h)             | 56         | FR3(h)               | 9          | FR3(h)               | 8          | LYN(m)         | 67         | FGFR2(h)             | 122        | FGFR2(h)             | 122        |
|                  |            | FGFR2(N549H)(h)      | 25         | FR4(h)               | 13         | FR4(h)               | 1          | MAP2K1(h)      | 99         | FGFR2(N549H)(h)      | 96         | FGFR2(N549H)(h)      | 96         |
|                  |            | FGFR3(h)             | 60         | Fms(h)               | 60         | Fms(h)               | 17         | MAP2K2(h)      | 106        | FGFR3(h)             | 106        | FGFR3(h)             | 106        |
|                  |            | FGFR4(h)             | 105        | Fyn(h)               | 86         | Fyn(h)               | 114        | MAP2K7(h)      | 103        | FGFR4(h)             | 92         | FGFR4(h)             | 92         |
|                  |            | Fgr(h)               | 57         | GCK(h)               | 13         | GCK(h)               | 17         | MAP3K5(h)      | 117        | Fgr(h)               | 106        | Fgr(h)               | 106        |
|                  |            | FR1(h)               | 28         | GRK5(h)              | 109        | GRK5(h)              | 114        | MAP3K7(h)      | 56         | FR1(h)               | 122        | FR1(h)               | 122        |
|                  |            | FR3(D835Y)(h)        | 9          | GRK6(h)              | 100        | GRK6(h)              | 108        | MAPK1(m)       | 90         | FR3(D835Y)(h)        | 108        | FR3(D835Y)(h)        | 108        |
|                  |            | FR3(h)               | 43         | GSK3β(h)             | 86         | GSK3β(h)             | 118        | MAPK11(h)      | 107        | FR3(h)               | 99         | FR3(h)               | 99         |
|                  |            | Frs(h)               | 2          | GSK3α(h)             | 88         | GSK3α(h)             | 99         | MAPK12(h)      | 109        | Frs(h)               | 95         | Frs(h)               | 95         |
|                  |            | Fms(h)               | 60         | Hsp90(h)             | 87         | Hsp90(h)             | 0          | MAPK13(h)      | 97         | Fms(h)               | 100        | Fms(h)               | 100        |
|                  |            | Fyn(h)               | 79         | Hck(h)               | 99         | Hck(h)               | 63         | MAPK14(h)      | 94         | Fyn(h)               | 103        | Fyn(h)               | 103        |
|                  |            | GCK(h)               | 44         | HIPK1(h)             | 82         | HIPK1(h)             | 78         | MAPK2K4(m)     | 95         | GCK(h)               | 109        | GCK(h)               | 109        |
|                  |            | GRK3(h)              | 122        | HIPK2(h)             | 93         | HIPK2(h)             | 63         | MAPK3(h)       | 89         | GRK3(h)              | 107        | GRK3(h)              | 107        |
|                  |            | GRK6(h)              | 101        |                      |            |                      |            |                |            |                      |            |                      |            |

**Table S1. Kinase Selectivity Data for PDK1 Inhibitors**

| Kinase | Cmpd 1 [10 μM] |                  | Cmpd 2 [1 μM] |                  | Cmpd 3 [1 μM] |                  | Cmpd 4 [10 μM] |            | Cmpd 5 [1 μM] |        | Cmpd 6 [1 μM] |        | Cmpd 7 [10 μM] |                  |     |
|--------|----------------|------------------|---------------|------------------|---------------|------------------|----------------|------------|---------------|--------|---------------|--------|----------------|------------------|-----|
|        | % Activity     | Kinase           | % Activity    | Kinase           | % Activity    | Kinase           | % Activity     | Kinase     | % Activity    | Kinase | % Activity    | Kinase | % Activity     | Kinase           |     |
|        |                | MKK7(h)          | 107           | MSSK1(h)         | 113           | MSSK1(h)         | 58             | PKO2(h)    | 78            |        |               |        |                |                  |     |
|        |                | MLCK(h)          | 53            | MST1(h)          | 102           | MST1(h)          | 40             | PLK2(h)    | 102           |        |               |        |                | MNK(h)           | 113 |
|        |                | MLK1(h)          | 1             | MST2(h)          | 119           | MST2(h)          | 104            | PLK3(h)    | 95            |        |               |        |                | MKK4(m)          | 112 |
|        |                | Mnk2(h)          | 30            | MST3(h)          | 195           | MST3(h)          | 106            | PRAK(h)    | 80            |        |               |        |                | MKK6(h)          | 115 |
|        |                | MRCR(h)          | 111           | MuSK(h)          | 89            | MuSK(h)          | 99             | PRKD2(h)   | 56            |        |               |        |                | MKK7(h)          | 95  |
|        |                | MRCR(h)          | 99            | NEK11(h)         | 117           | NEK11(h)         | 51             | PRKG1(h)   | 95            |        |               |        |                | MLCK(h)          | 110 |
|        |                | MSSK1(h)         | 83            | NEK2(h)          | 93            | NEK2(h)          | 80             | PTK2(h)    | 21            |        |               |        |                | MLK1(h)          | 91  |
|        |                | MSSK2(h)         | 61            | NEK3(h)          | 99            | NEK3(h)          | 88             | PTK6(h)    | 93            |        |               |        |                | Mnk2(h)          | 101 |
|        |                | MSSK1(h)         | 115           | NEK6(h)          | 114           | NEK6(h)          | 109            | PTPN7(h)   | 110           |        |               |        |                | MRCR(h)          | 101 |
|        |                | MST1(h)          | 30            | NEK7(h)          | 109           | NEK7(h)          | 121            | RAF1(h)    | 106           |        |               |        |                | MRCR(h)          | 101 |
|        |                | MST2(h)          | 60            | NLK(h)           | 58            | NLK(h)           | 78             | RET(h)     | 37            |        |               |        |                | MSK1(h)          | 109 |
|        |                | MST3(h)          | 125           | p70S6K(h)        | 85            | p70S6K(h)        | 0              | RIPK2(h)   | 93            |        |               |        |                | MSSK2(h)         | 106 |
|        |                | mTOR(h)          | 89            | PAK2(h)          | 111           | PAK2(h)          | 98             | ROCK1(h)   | 66            |        |               |        |                | MSSK1(h)         | 114 |
|        |                | mTOR-FKBP12(h)   | 94            | PAK3(h)          | 106           | PAK3(h)          | 38             | ROCK2(h)   | 87            |        |               |        |                | MST1(h)          | 103 |
|        |                | MuSK(h)          | 96            | PAK4(h)          | 99            | PAK4(h)          | 106            | ROCK2(r)   | 88            |        |               |        |                | MST2(h)          | 101 |
|        |                | NEK1(h)          | 116           | PAK5(h)          | 115           | PAK5(h)          | 121            | ROS1(h)    | 95            |        |               |        |                | MST3(h)          | 100 |
|        |                | NEK2(h)          | 116           | PAK6(h)          | 145           | PAK6(h)          | 112            | RPS8A1(h)  | 2             |        |               |        |                | mTOR(h)          | 102 |
|        |                | NEK3(h)          | 104           | PAR-1B(a)        | 9             | PAR-1B(a)        | 108            | RPS8A1(r)  | 6             |        |               |        |                | mTOR-FKBP12(h)   | 103 |
|        |                | NEK4(h)          | 110           | PASK(h)          | 103           | PASK(h)          | 4              | RPS8KA2(h) | 2             |        |               |        |                | MuSK(h)          | 98  |
|        |                | NEK7(h)          | 111           | PDGFR(h)         | 97            | PDGFR(h)         | 77             | RPS8KA3(h) | 2             |        |               |        |                | NEK11(h)         | 126 |
|        |                | NLK(h)           | 85            | PDGFR(D842V)(h)  | -6            | PDGFR(D842V)(h)  | 5              | RPS8KA4(h) | 43            |        |               |        |                | NEK2(h)          | 94  |
|        |                | p70S6K(h)        | 45            | PDGFR(r)         | 86            | PDGFR(r)         | 79             | RPS8KA5(h) | 68            |        |               |        |                | NEK3(h)          | 104 |
|        |                | PAK2(h)          | 99            | PDGFR(V561D)(h)  | 14            | PDGFR(V561D)(h)  | 10             | RPS8KB1(h) | 76            |        |               |        |                | NEK6(h)          | 99  |
|        |                | PAK3(h)          | 78            | PDK1(h)          | 5             | PDK1(h)          | 43             | SGK(h)     | 77            |        |               |        |                | NEK7(h)          | 102 |
|        |                | PAK4(h)          | 95            | Phk2(h)          | 74            | Phk2(h)          | 33             | SGK2(h)    | 70            |        |               |        |                | NLK(h)           | 100 |
|        |                | PAK5(h)          | 103           | Pim-1(h)         | 103           | Pim-1(h)         | 3              | SGK3(h)    | 94            |        |               |        |                | p70S6K(h)        | 108 |
|        |                | PAK6(h)          | 103           | Pim-2(h)         | 91            | Pim-2(h)         | 24             | SNF1L(h)   | 18            |        |               |        |                | PAK2(h)          | 94  |
|        |                | PAR-1B(b)        | 87            | Pim-3(h)         | 116           | Pim-3(h)         | 22             | SRG(h)     | 104           |        |               |        |                | PAK3(h)          | 88  |
|        |                | PASK(h)          | 109           | PKA(h)           | 77            | PKA(h)           | 51             | SRPK1(h)   | 106           |        |               |        |                | PAK4(h)          | 105 |
|        |                | PDGFR(D842V)(h)  | 1             | PKB(h)           | 98            | PKB(h)           | 15             | SRPK2(h)   | 108           |        |               |        |                | PAK5(h)          | 100 |
|        |                | PDGFR(r)         | 74            | PKB(a)           | 103           | PKB(a)           | 25             | STK10(h)   | 81            |        |               |        |                | PAK6(h)          | 101 |
|        |                | PDGFR(V561D)(h)  | 1             | PKC(h)           | 103           | PKC(h)           | 26             | STK11(h)   | 104           |        |               |        |                | FAK1-1(h)        | 96  |
|        |                | PDGFR(h)         | 102           | PKC(a)           | 53            | PKC(a)           | 32             | STK17A(h)  | 23            |        |               |        |                | PASK(h)          | 111 |
|        |                | PDK1(h)          | 2             | PKC(b)           | 72            | PKC(b)           | 99             | STK23(h)   | 90            |        |               |        |                | PDGFR(D842V)(h)  | 108 |
|        |                | Phk2(h)          | 76            | PKC(β)(h)        | 106           | PKC(β)(h)        | 118            | STK3(h)    | 69            |        |               |        |                | PDGFR(r)         | 108 |
|        |                | Pim-1(h)         | 107           | PKC(γ)(h)        | 88            | PKC(γ)(h)        | 94             | STK4(h)    | 32            |        |               |        |                | PDGFR(V561D)(h)  | 112 |
|        |                | Pim-2(h)         | 99            | PKC(δ)(h)        | 96            | PKC(δ)(h)        | 88             | SYK(h)     | 65            |        |               |        |                | PDGFR(h)         | 113 |
|        |                | Pim-3(h)         | 96            | PKC(ε)(h)        | 84            | PKC(ε)(h)        | 134            | TBK1(h)    | 59            |        |               |        |                | PDGFR(h)         | 17  |
|        |                | PKA(h)           | 106           | PKC(ζ)(h)        | 84            | PKC(ζ)(h)        | 81             | TEK(h)     | 106           |        |               |        |                | Phk2(h)          | 101 |
|        |                | PKB(a)           | 98            | PKC(η)(h)        | 107           | PKC(η)(h)        | 85             | TRKA(h)    | 46            |        |               |        |                | Pim-1(h)         | 104 |
|        |                | PKB(b)           | 90            | PKC(θ)(h)        | 95            | PKC(θ)(h)        | 95             | TSSK1(h)   | 24            |        |               |        |                | Pim-2(h)         | 100 |
|        |                | PKB(γ)(h)        | 102           | PKC(ι)(h)        | 103           | PKC(ι)(h)        | 57             | TSSK2(h)   | 56            |        |               |        |                | Pim-3(h)         | 97  |
|        |                | PKC(a)           | 108           | PKC(j)(h)        | 121           | PKC(j)(h)        | 107            | TYRO3(h)   | 111           |        |               |        |                | PKA(h)           | 113 |
|        |                | PKC(b)           | 94            | PKD2(h)          | 75            | PKD2(h)          | 15             | WNK3(h)    | 111           |        |               |        |                | PKB(h)           | 107 |
|        |                | PKC(H)(h)        | 105           | PKG1(h)          | 100           | PKG1(h)          | 34             | YES1(h)    | 77            |        |               |        |                | PKB(h)           | 107 |
|        |                | PKC(i)           | 95            | PKG1(a)          | 107           | PKG1(a)          | 29             | ZAP70(h)   | 114           |        |               |        |                | PKB(β)(h)        | 99  |
|        |                | PKC(k)           | 79            | Plk3(h)          | 111           | Plk3(h)          | 110            |            |               |        |               |        |                | PKC(a)           | 98  |
|        |                | PKC(l)           | 106           | PRAK(h)          | 78            | PRAK(h)          | 50             |            |               |        |               |        |                | PKC(β)(h)        | 95  |
|        |                | PKC(m)           | 108           | PRK2(h)          | 63            | PRK2(h)          | 13             |            |               |        |               |        |                | PKC(β)(h)        | 96  |
|        |                | PKC(n)           | 109           | PRK4(h)          | 70            | PRK4(h)          | 91             |            |               |        |               |        |                | PKC(γ)(h)        | 104 |
|        |                | PKC(O)(h)        | 78            | PTK5(h)          | 93            | PTK5(h)          | 90             |            |               |        |               |        |                | PKC(δ)(h)        | 105 |
|        |                | PKC(p)           | 98            | Pyk2(h)          | 85            | Pyk2(h)          | 47             |            |               |        |               |        |                | PKC(ε)(h)        | 96  |
|        |                | PKC(q)           | 86            | Ret(h)           | 30            | Ret(h)           | 9              |            |               |        |               |        |                | PKC(ζ)(h)        | 106 |
|        |                | PKD2(h)          | 96            | RIPK2(h)         | 111           | RIPK2(h)         | 78             |            |               |        |               |        |                | PKC(η)(h)        | 96  |
|        |                | PKG1(a)          | 97            | ROCK-I(h)        | 96            | ROCK-II(h)       | 46             |            |               |        |               |        |                | PKC(θ)(h)        | 108 |
|        |                | PKI1(h)          | 81            | ROCK-III(h)      | 59            | ROCK-III(h)      | 67             |            |               |        |               |        |                | PKC(ι)(h)        | 97  |
|        |                | Plk3(h)          | 85            | Rorb(h)          | 106           | Rorb(h)          | 106            |            |               |        |               |        |                | PKC(j)(h)        | 100 |
|        |                | PRAK(h)          | 75            | Rorb(h)          | 117           | Rorb(h)          | 54             |            |               |        |               |        |                | PKD2(h)          | 110 |
|        |                | PRK2(h)          | 10            | Rse(h)           | 84            | Rse(h)           | 19             |            |               |        |               |        |                | PKG1(h)          | 111 |
|        |                | PRK3(h)          | 103           | Rsk1(h)          | 83            | Rsk1(h)          | 13             |            |               |        |               |        |                | PKG1(h)          | 108 |
|        |                | PRK4(h)          | 92            | Rsk2(h)          | 118           | Rsk2(h)          | 24             |            |               |        |               |        |                | PKI1(h)          | 116 |
|        |                | PRK5(h)          | 59            | Rsk3(h)          | 120           | Rsk3(h)          | 8              |            |               |        |               |        |                | PKI3(h)          | 96  |
|        |                | Ret(V804L)(h)    | 2             | Rsk4(h)          | 103           | Rsk4(h)          | 15             |            |               |        |               |        |                | PKA(h)           | 98  |
|        |                | Ret(h)           | 1             | SAPK2a(h)        | 108           | SAPK2a(h)        | 72             |            |               |        |               |        |                | PRK2(h)          | 96  |
|        |                | Ret(V804M)(h)    | 13            | SAPK2a(T106M)(h) | 95            | SAPK2a(T106M)(h) | 79             |            |               |        |               |        |                | PRK2(h)          | 107 |
|        |                | RIPK2(h)         | 51            | SAPK2b(h)        | 85            | SAPK2b(h)        | 81             |            |               |        |               |        |                | PRK3(h)          | 96  |
|        |                | ROCK-I(h)        | 102           | SAPK3(h)         | 98            | SAPK3(h)         | 85             |            |               |        |               |        |                | PTK5(h)          | 106 |
|        |                | ROCK-II(h)       | 29            | SAPK4(h)         | 115           | SAPK4(h)         | 43             |            |               |        |               |        |                | Pyk2(h)          | 98  |
|        |                | Rorb(h)          | 98            | SGK(h)           | 70            | SGK(h)           | 19             |            |               |        |               |        |                | Ret(V804L)(h)    | 112 |
|        |                | Rorb(h)          | 98            | SGK2(h)          | 94            | SGK2(h)          | 26             |            |               |        |               |        |                | Ret(V804M)(h)    | 109 |
|        |                | Rse(h)           | 94            | SGK3(h)          | 81            | SGK3(h)          | 12             |            |               |        |               |        |                | RIPK2(h)         | 101 |
|        |                | Rsk1(h)          | 20            | SIK(h)           | 12            | SIK(h)           | 25             |            |               |        |               |        |                | ROCK-I(h)        | 97  |
|        |                | Rsk2(h)          | 5             | Snk(h)           | 112           | Snk(h)           | 107            |            |               |        |               |        |                | ROCK-II(h)       | 109 |
|        |                | Rsk3(h)          | 7             | SRPK1(h)         | 100           | SRPK1(h)         | 80             |            |               |        |               |        |                | Rorb(h)          | 82  |
|        |                | Rsk4(h)          | 12            | SRPK2(h)         | 99            | SRPK2(h)         | 96             |            |               |        |               |        |                | Rorb(h)          | 111 |
|        |                | SAPK2a(h)        | 107           | STK33(h)         | 82            | STK33(h)         | 58             |            |               |        |               |        |                | Rse(h)           | 118 |
|        |                | SAPK2a(T106M)(h) | 103           | Syk(h)           | 66            | Syk(h)           | 33             |            |               |        |               |        |                | Rsk1(h)          | 107 |
|        |                | SAPK2b(h)        | 110           | TAK1(h)          | 32            | TAK1(h)          | 83             |            |               |        |               |        |                | Rsk2(h)          | 124 |
|        |                | SAPK3(h)         | 106           | TAK2(h)          | 37            | TAK2(h)          | 81             |            |               |        |               |        |                | Rsk3(h)          | 102 |
|        |                | SAPK4(h)         | 108           | TAK3(h)          | 10            | TAK3(h)          | 66             |            |               |        |               |        |                | Rsk4(h)          | 113 |
|        |                | SGK(h)           | 74            | TBK1(h)          | 12            | TBK1(h)          | 47             |            |               |        |               |        |                | SAPK2a(h)        | 107 |
|        |                | SGK2(h)          | 86            | Tec2(h)          | 95            | Tec2(h)          | 5              |            |               |        |               |        |                | SAPK2a(T106M)(h) | 113 |
|        |                | SGK3(h)          | 104           | TLK2(h)          | 91            | TLK2(h)          | 106            |            |               |        |               |        |                | SAPK2b(h)        | 100 |
|        |                | SIK(h)           | 23            | TrkA(h)          | 31            | TrkA(h)          | 4              |            |               |        |               |        |                | SAPK3(h)         | 115 |
|        |                | Snk(h)           | 72            | TrkB(h)          | 42            | TrkB(h)          | 23             |            |               |        |               |        |                | SAPK4(h)         | 114 |
|        |                | Src(1-530)(h)    | 83            | TSSK1(h)         | 99            | TSSK1(h)         | 99             |            |               |        |               |        |                | SGK(h)           | 106 |
|        |                | Src(1341M)(h)    | 55            | TSSK2(h)         | 52            | TSSK2(h)         | 72             |            |               |        |               |        |                | SGK2(h)          | 97  |
|        |                | SRPK1(h)         | 104           | VRK2(h)          | 117           | VRK2(h)          | 115            |            |               |        |               |        |                | SGK3(h)          | 117 |
|        |                | SRPK2(h)         | 107           | Wnk2(h)          | 95            | Wnk2(h)          | 65             |            |               |        |               |        |                | SIK(h)           | 102 |
|        |                | STK33(h)         | 41            | Wnk3(h)          | 108           | Wnk3(h)          | 104            |            |               |        |               |        |                | Sak(h)           | 97  |
|        |                | Syk(h)           | 105           | Yes(h)           | 110           | Yes(h)           | 109            |            |               |        |               |        |                | Src(1-530)(h)    | 94  |
|        |                | TAK1(h)          | 90            | ZAP-70(h)        | 120           | ZAP-70(h)        | 99             |            |               |        |               |        |                | Src(1341M)(h)    | 102 |
|        |                | TAK2(h)          | 95            | ZIPK(h)          | 102           | ZIPK(h)          | 34             |            |               |        |               |        |                | SRPK(h)          | 104 |
|        |                | TAK3(h)          | 101           |                  |               |                  |                |            |               |        |               |        |                | SRPK(h)          | 102 |
|        |                | TBK1(h)          | 78            |                  |               |                  |                |            |               |        |               |        |                | STK33(h)         | 104 |
|        |                | Tec2(h)          | 109           |                  |               |                  |                |            |               |        |               |        |                | Syk(h)           | 102 |
|        |                | Tec2(R849W)(h)   | 74            |                  |               |                  |                |            |               |        |               |        |                | TAK1(h)          | 101 |
|        |                | Tec2(Y897S)(h)   | 82            |                  |               |                  |                |            |               |        |               |        |                | TAK2(h)          | 96  |
|        |                | TLK2(h)          | 80            |                  |               |                  |                |            |               |        |               |        |                | TAK3(h)          | 100 |
|        |                | TrkA(h)          | 10            |                  |               |                  |                |            |               |        |               |        |                | Tec(h) activated | 91  |
|        |                | TrkB(h)          | 59            |                  |               |                  |                |            |               |        |               |        |                | Tec2(h)          | 105 |
|        |                | TSSK1(h)         | 75            |                  |               |                  |                |            |               |        |               |        |                | Tec2(R849W)(h)   | 104 |
|        |                | TSSK2(h)         | 106           |                  |               |                  |                |            |               |        |               |        |                | Tec2(Y897S)(h)   | 111 |
|        |                | TrkA(h)          | 84            |                  |               |                  |                |            |               |        |               |        |                | TLK2(h)          | 100 |
|        |                | TLK2(h)          | 30            |                  |               |                  |                |            |               |        |               |        |                | TrkA(h)          | 108 |
|        |                | TLK3(h)          | 47            |                  |               |                  |                |            |               |        |               |        |                | TrkB(h)          | 95  |
|        |                | VRK2(h)          | 111           |                  |               |                  |                |            |               |        |               |        |                | TSSK1(h)         | 100 |
|        |                | Wnk2(h)          | 98            |                  |               |                  |                |            |               |        |               |        |                | TSSK2(h)         | 115 |
|        |                | Wnk3(h)          | 73            |                  |               |                  |                |            |               |        |               |        |                | Trk(h)           | 138 |
|        |                | Yes(h)           | 65            |                  |               |                  |                |            |               |        |               |        |                | TLK2(h)          | 110 |
|        |                | ZAP-70(h)        | 104           |                  |               |                  |                |            |               |        |               |        |                | TLK3(h)          | 99  |
|        |                | ZIPK(h)          | 57            |                  |               |                  |                |            |               |        |               |        |                | VRK2(h)          | 99  |
|        |                |                  |               |                  |               |                  |                |            |               |        |               |        |                | Wnk2(h)          | 104 |
|        |                |                  |               |                  |               |                  |                |            |               |        |               |        |                | Wnk3(h)          | 99  |
|        |                |                  |               |                  |               |                  |                |            |               |        |               |        |                | Yes(h)           | 91  |
|        |                |                  |               |                  |               |                  |                |            |               |        |               |        |                | ZAP-70(h)        | 100 |
|        |                |                  |               |                  |               |                  |                |            |               |        |               |        |                | ZIPK(h)          | 121 |

## Supplementary Figure legends

### **Supplementary Figure S1. Dose dependent toxicity of GeneBloc antisense RNA lipid transfection reagent.**

PC-3 cells were transfected with PDK1 targeting GeneBloc antisense RNA (GB) or a scrambled mismatch control RNA (mm) using increasing concentration of lipid in the transfection mixture. Cell viability was determined at 72 hours post-transfection by ATP ViaLight.

### **Supplementary Figure S2. Optimization of PDK1 knockdown in PC-3 cells shows potent pathway inhibition but has minimal effect on cell proliferation.**

**(a)** Thirty independent shRNA sequences were tested for their PDK1 knockdown potential. Quantitative PCR for PDK1 was performed for each shRNA 48 hours after transfection and is represented as a percentage of total PDK1 mRNA in non transfected control cells. Arrows indicate the greatest degree of target mRNA knockdown. **(b)** A pool of stably transduced PC-3 cells containing doxycycline-inducible PDK1 shRNA coupled to GFP expression was incubated with doxycycline and analyzed for GFP expression by flow cytometry. Arrow indicates a population of stably transduced cells, based on antibiotic selection, which fail to successfully induce GFP (and therefore PDK1 shRNA) upon doxycycline treatment. **(c)** PC-3 cells, expressing tet-KRAB, were transduced with either of two independent PDK1 shRNAs (sh3 and sh20) were subcloned, grown in the absence or presence of doxycycline, and analyzed for PDK1 protein knockdown and downstream signaling effects. **(d)** Representative cell proliferation assays of isogenic PC-3 subclones (analyzed in part c) grown in the absence or presence of doxycycline.
